# Supplementary material for: Rivaroxaban for cancer-associated venous thromboembolism
Source: PubMed Central journal article supplement — Sci Prog. 2021 Apr 29;104(2):00368504211012160. doi: 10.1177/00368504211012160 (PMC10454885; doi:10.1177/00368504211012160), 2021-04-29
Supplement: sj-pdf-2-sci-10.1177_00368504211012160.pdf [file sj-pdf-2-sci-10.1177_00368504211012160.pdf]

Table S1. Search strategies.

A. PubMed search strategy

---

| Query | Search terms                                                                                                                                                                                                                                                                                                                                                                                                         |
|-------|----------------------------------------------------------------------------------------------------------------------------------------------------------------------------------------------------------------------------------------------------------------------------------------------------------------------------------------------------------------------------------------------------------------------|
| #1    | tumor OR cancer OR malignancy OR neoplasm OR carcinoma                                                                                                                                                                                                                                                                                                                                                               |
| #2    | rivaroxaban OR apixaban OR edoxaban OR factor Xa inhibitor<br>OR anticoagulation OR factor IIa inhibitor OR dabigatran OR<br>direct oral anticoagulants OR DOAC OR DOACs OR new oral<br>anticoagulants OR NOAC OR NOACs OR warfarin OR vitamin<br>K antagonist OR VKA OR VKAs OR heparin OR dalteparin OR<br>enoxaparin OR fondaparinux OR un-fractionated heparin OR<br>UFH OR low molecular weight heparin OR LMWH |
| #3    | blood clots OR thrombosis OR embolism OR thromboembolism<br>OR venous thromboembolism OR venous thromboembolic<br>disease OR VTE OR pulmonary embolism OR PE OR deep vein<br>thrombosis OR DVT OR superficial vein thrombosis OR SVT<br>OR splanchnic vein thrombosis OR SPVT OR central venous<br>catheter related thrombosis                                                                                       |
| #4    | random OR randomized OR control OR controlled OR<br>randomized controlled trial OR RCT                                                                                                                                                                                                                                                                                                                               |
| #5    | #1 AND #2 AND #3 AND #4                                                                                                                                                                                                                                                                                                                                                                                              |

---

## B. Web of Science search strategy

---

| Query | Search terms                                                                                                                                                                                                                                                                                                                                                                                                         |
|-------|----------------------------------------------------------------------------------------------------------------------------------------------------------------------------------------------------------------------------------------------------------------------------------------------------------------------------------------------------------------------------------------------------------------------|
| #1    | tumor OR cancer OR malignancy OR neoplasm OR carcinoma                                                                                                                                                                                                                                                                                                                                                               |
| #2    | rivaroxaban OR apixaban OR edoxaban OR factor Xa inhibitor<br>OR anticoagulation OR factor IIa inhibitor OR dabigatran OR<br>direct oral anticoagulants OR DOAC OR DOACs OR new oral<br>anticoagulants OR NOAC OR NOACs OR warfarin OR vitamin<br>K antagonist OR VKA OR VKAs OR heparin OR dalteparin OR<br>enoxaparin OR fondaparinux OR un-fractionated heparin OR<br>UFH OR low molecular weight heparin OR LMWH |
| #3    | blood clots OR thrombosis OR embolism OR thromboembolism<br>OR venous thromboembolism OR venous thromboembolic<br>disease OR VTE OR pulmonary embolism OR PE OR deep vein<br>thrombosis OR DVT OR superficial vein thrombosis OR SVT<br>OR splanchnic vein thrombosis OR SPVT OR central venous<br>catheter related thrombosis                                                                                       |
| #4    | random OR randomized OR control OR controlled OR<br>randomized controlled trial OR RCT                                                                                                                                                                                                                                                                                                                               |
| #5    | #1 AND #2 AND #3 AND #4                                                                                                                                                                                                                                                                                                                                                                                              |

---

### C. Cochrane Central Register of Controlled Trials search strategy

---

| Query | Search terms                |
|-------|-----------------------------|
| #1    | tumor                       |
| #2    | rivaroxaban                 |
| #3    | thromboembolism             |
| #4    | randomized controlled trial |
| #5    | #1 AND #2 AND #3 AND #4     |

---

Note: In this search, #1, #2, #3, and #4 were searched with corresponding Medical Subject Heading terms.

#### D. Embase search strategy

---

| Query | Search terms                |
|-------|-----------------------------|
| #1    | tumor                       |
| #2    | rivaroxaban                 |
| #3    | thromboembolism             |
| #4    | randomized controlled trial |
| #5    | #1 AND #2 AND #3 AND #4     |

---

Note: In this search, #1, #2, #3, and #4 were searched with corresponding Medical Subject Heading terms.

## E. China National Knowledge Infrastructure search strategy

---

| Query | Search terms            |
|-------|-------------------------|
| #1    | 肿瘤                      |
| #2    | 利伐沙班                    |
| #3    | 血栓                      |
| #4    | 随机对照试验                  |
| #5    | #1 AND #2 AND #3 AND #4 |

---
